# Supplementary material for: RETRACTED: Regulating BMI1 expression via miRNAs promote Mesenchymal to Epithelial Transition (MET) and sensitizes breast cancer cell to chemotherapeutic drug
Source: PubMed Central journal article supplement (PMC5796693; doi:10.1371/journal.pone.0190245), 2018-02-02
Supplement: pone.0190245.s008.pdf [file pone.0190245.s008.pdf]

**(S1 Table)** Table represents the primers used in the RT-PCR and Cloning/Mutagenesis.

| SI no | PRIMER                   | FORWARD 5' to 3'                                          | REVERSE 5' to 3'                                          |
|-------|--------------------------|-----------------------------------------------------------|-----------------------------------------------------------|
| 19    | BMI1 3' UTR              | ATTACTCGAGGGAAAAAATTTT<br>AAACCCCTGA                      | ATTAGCGGCCGCATAAACAGAT<br>ACATCTTTCAATGGGC                |
| 20    | SDM BMI1 3'UTR 15a       | GTCAAATCATTACTTTTACATAT<br>ATCTTCTGCTTTCTTTAAAAATAT<br>AG | CTATATTAAAGAAAGCAGAAG<br>ATATATGTAAAAGTAATGATTT<br>AATGAC |
| 22    | SDM BMI1 3' UTR 200a/203 | ATTTGTACAGTCCCATTGTA                                      | ATCCTTTTTATTGGATTTTT                                      |
| 23    | SDM BMI1 3' UTR 200b/429 | AAAGCGGGTACTACCGTTTA                                      | CACAATATTTCTTTATAGCA                                      |
