# Supplementary material for: RETRACTED: Regulating BMI1 expression via miRNAs promote Mesenchymal to Epithelial Transition (MET) and sensitizes breast cancer cell to chemotherapeutic drug
Source: PubMed Central journal article supplement (PMC5796693; doi:10.1371/journal.pone.0190245), 2018-02-02
Supplement: pone.0190245.s009.pdf [file pone.0190245.s009.pdf]

**(S2 Table)** Table represents the primary Antibodies used in the Western Blotting.

| <b>CATALOGUE NO.</b> | <b>ANTIBODY</b>       | <b>COMPANY</b>             |
|----------------------|-----------------------|----------------------------|
| #40278               | ABCG2                 | Cell signalling technology |
| #31503               | BAX                   | Abcam                      |
| #250555              | BCL2                  | Abbiotec                   |
| #250920              | Beta-Actin            | Abbiotec                   |
| #8480                | $\beta$ -catenin      | Cell signalling technology |
| #ab2388              | BID                   | abcam                      |
| #6964                | BMI1                  | Cell signalling technology |
| #13116               | N-cad                 | Cell signalling technology |
| #3879                | Snail                 | Cell signalling technology |
| #5741                | Vimentin              | Cell signalling technology |
| #8240                | Ubiquityl-Histone H2A | Cell signalling technology |
| #3396                | ZEB1                  | Cell signalling technology |
| #13069               | RING1A                | Cell signalling technology |
| #5694                | RING1B                | Cell signalling technology |
| #ab1767              | HDAC1                 | abcam                      |
| #05-814              | HDAC2                 | Merck Millipore            |
| #ab82557             | HDAC6                 | abcam                      |
| #07-505              | HDAC8                 | Merck Millipore            |
